# Supplementary material
Source: publisher figshare collection journal article supplement (https://karger.figshare.com/articles/dataset/_/4659130)
Supplement: Supplementary file 1 [file 1]

## Appendix A

List of stimulus sentences; test sequences in Position 1 and Position 2 are underlined. Acute accent marks phonemically long segments; spelled ‘y’ and ‘i’ in Slovak both correspond to [i].

### PrWd

*Rozdelil to: Orbán iba dyňu, a gurmán iba ryžu.*

He has divided it: Orbán (got) only a melon, and gourmet only rice.

*Rozdelil to: ženám iba dyňu, a devám iba ryžu.*

He has divided it: to women only a melon, and to girls only rice.

*Rozdelil to: jogín aby nabral, a rabín aby zabral.*

He has divided it: for yogi to gain, and for rabbi to take/push.

*Rozdelil to: malým aby hrali, a veľkým aby vzali.*

He has divided it: for little ones to play and the tall ones to take.

### Rise

*Rozdelil to: dal Ján, iba ak hral, a Orbán, iba ak mal.*

He has divided it: Ján gave, only if he played, and Orbán gave, only if he had.

*Rozdelil to: dal nám, iba ak hral, a devám, iba ak mal.*

He has divided it: he gave to us, only if he played, and to girls, only if he had.

*Rozdelil to: dal Zlín, aby zahral, a Devín, aby nahral.*

He has divided it: he gave Zlín, to play, and Devín, to gain.

*Rozdelil to: dal zlým, aby hrali, a dobrým, aby vzali.*

He has divided it: he gave to the bad ones, to play, and to the good ones, to take.

### Fall

*Rozdelil to: dal Ján. Iba ak hral. Aj Orbán. Iba ak mal.*

He has divided it: Ján gave. Only if he played. Also Orbán gave. Only if he had.

*Rozdelil to: dal nám. Iba ak hral. Aj devám. Iba ak mal.*

He has divided it: he gave to us. Only if he played. Also to girls. Only if he had.

*Rozdelil to: dal Zlín. Aby zahral. Aj Devín. Aby nahral.*

He has divided it: he gave Zlín. To play. Also Devín. To gain.

*Rozdelil to: dal zlým. Aby hrali. Aj dobrým. Aby vzali.*

He has divided it: he gave to the bad ones. To play. Also to the good ones. To take.

## Appendix B

Example of a complete prompt sentence together with picture (Gloss: ‘He has divided it: to women only a melon, and to girls only rice.’)

The diagram shows a central text prompt: "Rozdelil to: ženám iba dyňu, a devám iba ryžu." (He has divided it: to women only a melon, and to girls only rice). To the left of the text are two images: a halved melon and a bowl of white rice. Two blue arrows originate from these images. One arrow points from the melon to a photograph of four smiling women. The other arrow points from the rice to a photograph of four young girls wearing traditional folk costumes.
